# Supplementary material
Source: publisher figshare collection journal article supplement (https://tandf.figshare.com/ndownloader/files/19274876)
Supplement: Supplementary file 1 [file 19274876]

**Supplemental Material 1**

**Key supporting articles:**

- Aaronson N., Choucair A., Elliott T., Greenhalgh J., Halyard M., et al; ISOQOL. 2015. *User’s guide to implementing patient-reported outcomes assessment in clinical practice*. (version: January 2015), http://www.isoqol.org/UserFiles/2015UsersGuide-Version2.pdf. (accessed July 9, 2018).
- Basch E., Spertus J., Dudley R.A., Wu A., Chuahan, C., et al. 2015. Methods for Developing Patient-Reported Outcome-Based Performance Measures (PRO-PMs). *Value Health.,* 18, 493-504.
- Colquhoun H.L., Carroll K., Eva K.W., Grimshaw J.M., Ivers N., et al. 2017. Advancing the literature on designing audit and feedback interventions: identifying theory-informed hypotheses. *Implement Sci.*, 12, 117.
- Eton D.T., Beebe T.J., Hagen P.T., Halyard M.Y., Montori, V.M., et al. 2014. Harmonizing and consolidating the measurement of patient-reported information at health care institutions: a position statement of the Mayo Clinic. *Patient Relat Outcome Meas., 5*, 7-15.
- Flodgren G., Parmelli E., Doumit G., Gattellari M., O'Brien M.A., et al. 2011. Local opinion leaders: effects on professional practice and health care outcomes. *Cochrane Database Syst Rev.*, Cd000125.
- Forsetlund, L., Bjorndal, A., Rashidian, A., Jamtvedt, G., O'Brien, M. A., Wolf, F., . . . Oxman, A. D. (2009). Continuing education meetings and workshops: effects on professional practice and health care outcomes. *Cochrane Database Syst Rev.*, Cd003030.
- Giguere, A., Legare, F., Grimshaw, J., Turcotte, S., Fiander, M., Grudniewicz, A., . . . Gagnon, M. P. (2012). Printed educational materials: effects on professional practice and healthcare outcomes. *Cochrane Database Syst Rev.*, Cd004398.
- Greenhalgh J. 2009. The applications of PROs in clinical practice: what are they, do they work, and why? *Qual Life Res.*, 18, 115-123.
- Haverman L., van Oers H.A., Limperg P.F., Hijmans C.T., Schepers S.A., et al. 2014. Implementation of electronic patient reported outcomes in pediatric daily clinical practice: The KLIK experience. *Clin Pract Pediatr Psychol.*, 2, 50-67.
- Locklear T.M.B., Willig J.H., Staman K., Bhavsar N., Wienfut K., et al. 2014. Strategies for overcoming barriers to the implementation of Patient-Reported Outcomes Measures - An NIH Health Care Systems Research Collaboratory Patient Reported Outcomes Core White Paper. https://www.nihcollaboratory.org/Products/Strategies-for-Overcoming-Barriers-to-PROs.pdf. (accessed July 9, 2018).
- Santana M.J., Haverman L., Absolom K., Takeuchi E., Feeny D., et al. 2015. Training clinicians in how to use patient-reported outcome measures in routine clinical practice. *Qual Life Res.*, 24, 1707-1718.
- Snyder C.F., Aaronson N.K., Choucair A.K., Elliott T.E., Greenhalgh J., et al. 2012. Implementing patient-reported outcomes assessment in clinical practice: a review of the options and considerations. *Qual Life Res.*, 21, 1305-1314.
- Wintner L.M., Sztankay M., Aaronson N., Bottomley A., Giesinger J.M., et al. 2016. The use of EORTC measures in daily clinical practice-A synopsis of a newly developed manual. *Eur J Cancer*, 68, 73-81.
